# Supplementary material for: Veterans’ Mental Health in Higher Education Settings: Services and Clinician Education Needs
Source: Atypon-hosted journal article supplement (doi:10.1176/appi.ps.201600065), 2017-03-01
Supplement: appi.ps.201600065.ds001.pdf [file appi.ps.201600065.ds001.pdf]

 


Psychiatry Online
