# Supplementary material for: Veterans’ Mental Health in Higher Education Settings: Services and Clinician Education Needs
Source: Atypon-hosted journal article supplement (doi:10.1176/appi.ps.201600065), 2017-03-01
Supplement: appi.ps.201600065.ds001.pdf [file appi.ps.201600065.ds001.pdf]

## Veterans in Higher Education

Appendix A. Staffing and Veteran Demographics ( $N = 80$  Schools)

|                                                                                | <i>N</i> | %  |
|--------------------------------------------------------------------------------|----------|----|
| Number of mental health staff at center                                        |          |    |
| Psychologists                                                                  |          |    |
| 1-5                                                                            | 36       | 45 |
| 6-10                                                                           | 18       | 23 |
| 11-15                                                                          | 6        | 8  |
| 16+                                                                            | 3        | 4  |
| Post-doctoral trainees                                                         |          |    |
| 1-5                                                                            | 33       | 41 |
| Pre-doctoral trainees                                                          |          |    |
| 1-5                                                                            | 38       | 48 |
| 6-10                                                                           | 4        | 5  |
| 11-15                                                                          | 1        | 1  |
| Psychiatrists                                                                  |          |    |
| 1-5                                                                            | 30       | 38 |
| 6-10                                                                           | 2        | 3  |
| Marriage and family therapist                                                  |          |    |
| 1-5                                                                            | 41       | 51 |
| 6-10                                                                           | 1        | 1  |
| 11-15                                                                          | 1        | 1  |
| Licensed clinical social workers                                               |          |    |
| 1-5                                                                            | 24       | 30 |
| 6-10                                                                           | 2        | 3  |
| Master's level trainees                                                        |          |    |
| 1-5                                                                            | 11       | 14 |
| 6-10                                                                           | 2        | 3  |
| 11-15                                                                          | 1        | 1  |
| 16+                                                                            | 1        | 1  |
| Psychiatric nurse practitioners                                                |          |    |
| 1-5                                                                            | 6        | 8  |
| Mental health educators                                                        |          |    |
| 1-5                                                                            | 3        | 4  |
| Other mental health staff                                                      |          |    |
| 1-5                                                                            | 7        | 9  |
| Number of veterans receiving mental health services at the center ( $n = 44$ ) |          |    |
| 0                                                                              | 1        | 2  |
| 1 – 10                                                                         | 37       | 84 |
| 11 – 20                                                                        | 3        | 7  |
| 21 – 40                                                                        | 1        | 2  |
| 41 – 60                                                                        | 2        | 5  |

Appendix B. Mental Health Education Provided and Needed ( $N = 80$  Schools)

|                                                                                            | N  | % yes |
|--------------------------------------------------------------------------------------------|----|-------|
| Center provides education to school faculty and staff                                      | 77 | 96    |
| Topics covered in faculty/staff education                                                  |    |       |
| Depression                                                                                 | 53 | 66    |
| Anxiety                                                                                    | 50 | 63    |
| Alcohol and substance abuse                                                                | 34 | 43    |
| Suicide prevention                                                                         | 27 | 34    |
| Identifying warning signs and general distress                                             | 27 | 34    |
| PTSD                                                                                       | 25 | 31    |
| Combat veterans and combat related problems                                                | 22 | 28    |
| Military culture                                                                           | 17 | 21    |
| Other                                                                                      | 14 | 18    |
| Referring to the on-campus mental health center                                            | 10 | 13    |
| Stress management                                                                          | 9  | 11    |
| Center provides education to general student population                                    | 74 | 93    |
| Topics covered in student education                                                        |    |       |
| Anxiety                                                                                    | 57 | 71    |
| Depression                                                                                 | 55 | 69    |
| Alcohol and substance abuse                                                                | 36 | 45    |
| PTSD                                                                                       | 17 | 21    |
| Combat veterans and combat related problems                                                | 17 | 21    |
| Military culture                                                                           | 16 | 20    |
| Other - mindfulness, sleep hygiene, bystander training                                     | 16 | 20    |
| Suicide prevention                                                                         | 15 | 19    |
| Relational issues/domestic violence                                                        | 13 | 16    |
| Identifying signs of distress in other students/yourself                                   | 12 | 15    |
| Stress management                                                                          | 12 | 15    |
| Eating disorders                                                                           | 6  | 8     |
| Sexual assault/sexual trauma                                                               | 5  | 6     |
| Education needs identified by directors                                                    |    |       |
| Military sexual trauma                                                                     | 56 | 70    |
| Military culture                                                                           | 53 | 66    |
| Traumatic brain injury                                                                     | 51 | 64    |
| PTSD                                                                                       | 54 | 68    |
| Resources for veterans and/or families                                                     | 47 | 59    |
| Substance abuse problems                                                                   | 41 | 51    |
| Major depressive disorder                                                                  | 39 | 49    |
| Family, marital, and parenting issues                                                      | 38 | 48    |
| Readjustment and transition issues                                                         | 13 | 16    |
| Other - female veteran issues, academic accommodations, sleep disorders, eating disorders, | 17 | 21    |

## Veterans in Higher Education

|                                                                                                                |    |    |
|----------------------------------------------------------------------------------------------------------------|----|----|
| psychosis, concerns with confidentiality                                                                       |    |    |
| VA system - referrals, networking, facility tour                                                               | 15 | 19 |
| Encouraging Vets to seek MH treatment/developing rapport with Vet community/ overview of working with veterans | 9  | 11 |
| When to refer out                                                                                              | 6  | 8  |
| Faculty sensitivity training/PTSD in an academic setting/awareness of triggers                                 | 6  | 8  |
| Preferred education modality ( <i>n</i> = 70)                                                                  |    |    |
| Education workshop (4 hours)                                                                                   | 45 | 64 |
| Education lecture (1 hour)                                                                                     | 42 | 60 |
| Online training                                                                                                | 33 | 47 |
| Education handout                                                                                              | 13 | 19 |
| Other                                                                                                          | 2  | 3  |

---
